# Supplementary material for: Fusedly Deposited Frequency-Selective Composites Fabricated by a Dual-Nozzle 3D Printing as Microwave Filter
Source: MDPI journal article supplement (doi:10.3390/polym16060786), 2024-03-12
Supplement: s1 [file s1]

## Supporting information

# Fusedly Deposited Frequency-Selective Composites Fabricated by a Dual-Nozzle 3D Printing as Microwave Filter

Jae-Yeon Cho <sup>1</sup>, Young-Chan Oh <sup>1</sup>, Seung-Cheol Shin <sup>1</sup>, Sun-Kon Lee <sup>1</sup>, Hyoung-Seock Seo <sup>2,3,\*</sup> and Sang-Eui Lee <sup>1,\*</sup>

<sup>1</sup> Department of Mechanical Engineering, Inha University, 100 Inha-ro, Michuhol-gu, Incheon 22212, Republic of Korea

<sup>2</sup> School of Naval Architecture and Ocean Engineering, University of Ulsan, Ulsan 44610, Republic of Korea

<sup>3</sup> Department of Autonomous Vehicle System Engineering, Chungnam National University, 220 Gung-dong, Youseong-gu, Daejeon 305-764, Republic of Korea

\* Correspondence: seohs@cnu.ac.kr (H.-S.S.); selee@inha.ac.kr (S.-E.L.); Tel.: +82-42-821-7223 (H.-S.S.); +82-32-860-7377 (S.-E.L.)

In order to fabricate FD-FSCs transmitting and absorbing microwaves in the X-band (8.2~12.4 GHz) range, the resonance frequency was calculated according to the design parameters of a metallic FSS. The approximate admittance predicting the resonant frequency of a metallic FSS [19] is as follows.

$$Y_{ind} \approx (-j)(\beta - \beta^{-1}) \frac{\left[\left(\frac{A}{C}\right) + \frac{1}{2}\left(\frac{A}{\lambda}\right)^2\right]}{\ln \csc\left(\frac{\pi\delta}{2A}\right)} \quad \beta = \left(1 - 0.41 \frac{\delta}{A}\right) / \left(A/\lambda\right) \quad (S1)$$

Design parameters  $A$  and  $B$  are the side lengths of periodic patterns and apertures, and  $\lambda$  is the wavelength.  $\delta$  is defined as  $(A-C)/2$ . At the resonance frequency,  $Y_{ind} = 0$  and in the case of a metallic FSS, microwaves are completely transmitted.  $Y_{ind}$  depends only on two parameters  $A/\lambda$  and  $C/A$ . When  $\beta - \beta^{-1}$  is zero,  $Y_{ind}$  is zero.

$\beta$  for  $\beta - \beta^{-1} = 0$  is obtained as follows.

$$\beta = \left(1 - 0.41 \frac{\delta}{A}\right) / \left(A/\lambda\right) = 1 \quad (S2)$$

$$\left(1 - 0.41 \frac{\delta}{A}\right) = \frac{A}{\lambda} \quad (S3)$$

The resonance frequency is determined by the design parameters  $A$  and  $C$  of the inductive FSS, an aperture type of FSS with the conductive areas connected together. The resonance frequency ( $f_{res}$ ) can be calculated from Equation (S3). Table S1 provides the calculated  $f_{res}$  according to the unit cell geometry of the FSS.

**Table S1.** Design parameters and resonant frequency of the metallic FSS.

| $A$ (mm) | $C$ (mm) | $\delta$ (mm) | $\lambda$ (mm) | $f$ (GHz) |
|----------|----------|---------------|----------------|-----------|
| 10.0     | 7.0      | 1.5           | 10.7           | 28.2      |
| 10.0     | 8.0      | 1.0           | 10.4           | 28.8      |
| 10.0     | 9.0      | 0.5           | 10.2           | 29.4      |
| 18.0     | 12.6     | 2.7           | 19.2           | 15.6      |
| 18.0     | 14.4     | 1.8           | 18.8           | 16.0      |
| 18.0     | 16.2     | 0.9           | 18.4           | 16.3      |
| 20.0     | 14.0     | 3.0           | 21.3           | 14.1      |
| 20.0     | 16.0     | 2.0           | 20.9           | 14.4      |
| 20.0     | 18.0     | 1.0           | 20.4           | 14.7      |
| 24.0     | 16.8     | 3.6           | 25.6           | 11.7      |
| 24.0     | 19.2     | 2.4           | 25.0           | 12.0      |
| 24.0     | 21.6     | 1.2           | 24.5           | 12.2      |
| 30.0     | 21.0     | 4.5           | 32.0           | 9.4       |
| 30.0     | 24.0     | 3.0           | 31.3           | 9.6       |
| 30.0     | 27.0     | 1.5           | 30.6           | 9.8       |

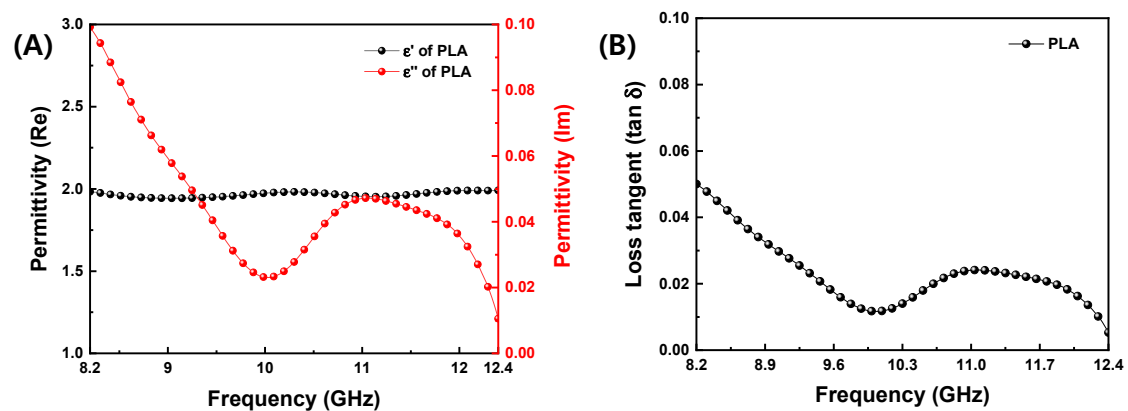

**Figure S1.** Measured permittivity of PLA. (A) Real and imaginary parts of permittivity, and (B) dielectric loss tangent.
